# Supplementary material
Source: PubMed Central journal article supplement (PMC7179308)
Supplement: AAC.02159-19-s0001.pdf [file AAC.02159-19-s0001.pdf]

# 1 Supplementary Data

## 2 1. Supplementary Methods

### 3 1.1 Table S1: Bacterial strains and cell lines

| <b>Bacterial Strains</b>                           | <b>Description</b>                                                                                                              | <b>Source and Reference</b> |
|----------------------------------------------------|---------------------------------------------------------------------------------------------------------------------------------|-----------------------------|
| EHEC O157:H7 EDL933                                | <i>stx1a</i> ; <i>stx2a</i>                                                                                                     | [1]                         |
| EHEC/EAEC O104:H4 11-02027                         | <i>stx2a</i> , resistances: tetracyclines, streptomycin, trimethoprim/sulphonamides, ampicillin, nalidixic acid, cephalosporins | [2]                         |
| <i>C. rodentium</i> DBS770                         | <i>stx2<sub>dact</sub></i> -expressing <i>C. rodentium</i> DBS100 lysogenized with phage $\phi$ 1720a-02                        | [3]                         |
| C600W34                                            | <i>E. coli</i> C600 transduced with phage 933W from EHEC strain EDL933                                                          | [4]                         |
| <i>C. rodentium stx2<sub>d</sub>::Gluc</i> (MBK22) | DBS770 <i>stx2<sub>dact</sub>::gluc</i> , <i>aphT</i>                                                                           | This study                  |
| C600W34 <i>stx2<sub>a</sub>::Gluc</i> (JLG5)       | C600 W34 <i>stx2<sub>a</sub>::gluc</i> , <i>aphT</i>                                                                            | This study                  |
| <b>Cell lines</b>                                  | <b>Medium</b>                                                                                                                   | <b>Source</b>               |
| VeroB4                                             | OptiPRO SFM (Gibco) supplemented with 1x glutamine                                                                              | DSMZ-AC33                   |
| LLC-PK1                                            | Medium 199 (Biochrom) supplemented with 5% FBS (Sigma)                                                                          | ATCC CL-101                 |

4

5

6  
7

## 1.2 Table S2: Plasmids and Oligonucleotides used in this study.

| Plasmids             | Description/genotype                                                                                                                                          | Reference                    |
|----------------------|---------------------------------------------------------------------------------------------------------------------------------------------------------------|------------------------------|
| pKD46                | repA101(ts), oriR101, <i>bla</i> , P <sub>araB</sub> ( <i>gam</i> , <i>bet</i> , <i>exo</i> )                                                                 | [5]                          |
| pMBK4                | pSB377 <i>stx2aA::gluc</i> , <i>aphT</i>                                                                                                                      | This study                   |
| pSB377               | <i>tetAB</i> , oriR6K                                                                                                                                         | [6]                          |
| pWRG701              | High-copy vector, colE1-replicon; carries <i>Gaussia luciferase</i> (glow kinetics) <i>GlucM43LM110L aphT</i> flanked by FRT sequences; ampicillin resistance | kind gift from Roman Gerlach |
| Oligonucleotides     |                                                                                                                                                               |                              |
| Designation          | Sequence (5'-3')                                                                                                                                              | Reference                    |
| Stx2-Gluc fusion Fw  | TTTTATATCTGCGCCGGGTCTGGTGCTGA<br>TTACTTCAGCCAAAAGGAACACCTGTATA<br>TGAAACCGACCGAAAACAACGA                                                                      | This study                   |
| Stx2_Com fusion Rev  | ATTAACAGAAGCTAATGCAAATAAAACCG<br>CCATAAACATCTTCTTCATGCTTAACTCCT<br>CGTGTAGGCTGGAGCTGCTTC                                                                      | This study                   |
| Stx2A outside Fw     | AGACGGTCAGGGAAGTTCAG                                                                                                                                          | This study                   |
| Stx2B primer Rev     | AATCCGGAGCCTGATTCACA                                                                                                                                          | This study                   |
| DBS770 outside Rev   | GCGCGGATCCTTCGAATAAA                                                                                                                                          | This study                   |
| DBS Stx2B dn Rev     | TAACAAATTCTCAGTCGGGCA                                                                                                                                         | This study                   |
| Seq Com Rev          | TCGGAATAGGAACTAAGGAGGA                                                                                                                                        | This study                   |
| GA DBS Stx2 up Fw    | GGCTGACATGGGAATTCCTGCAGCCCGG<br>GGGATCCTCAGTCAGAACGGATGATATTG<br>CAG                                                                                          | This study                   |
| GA DBS Stx2 up Rev   | TTCGGTCGGTTTCATATACAGGTGTTCCCT<br>TTTGGCTGAAG                                                                                                                 | This study                   |
| GA DBS GlucKan Fw    | AAGGAACACCTGTATATGAAACCGACCGA<br>AAACAACGAAG                                                                                                                  | This study                   |
| GA DBS GlucKan Rev   | AGCTAAGGAAGCTAACGTGTAGGCTGGA<br>GCTGC                                                                                                                         | This study                   |
| GANewDBS Stx2B dn Fw | GCTCCAGCCTACACGCAGGAGTTAAATAT<br>GAAGAAGATATTTGTAGCGG                                                                                                         | This study                   |
| GA DBS Stx2B dn Rev  | AAGCTCAATAAAAAGCCCCACCGCGGTG<br>GCGGCCGCACCATGCAGGATTTTTTTTTT<br>AACAAATTCTCAG                                                                                | This study                   |

### 1.3 Table S3: Antibiotics used in this study.

Stock solutions including solvent and supplier are listed for all antibiotics used in this study.

| Antibiotic                  | stock solution                | Supplier                   |
|-----------------------------|-------------------------------|----------------------------|
| Azithromycin                | 100 mg/ml in EtOH             | Sigma Aldrich / Merck      |
| Carbenicillin               | 3 mg/ml in H <sub>2</sub> O   | Carl Roth GmbH + Co. KG    |
| Cefalexin                   | 1 mg/ml in H <sub>2</sub> O   | Sigma Aldrich / Merck      |
| Chloramphenicol             | 30 mg/ml in DMSO              | Carl Roth GmbH + Co. KG    |
| Ciprofloxacin hydrochloride | 5 mg/ml in H <sub>2</sub> O   | Sigma Aldrich / Merck      |
| Enrofloxacin                | 50 µg/ml in DMSO              | Sigma Aldrich / Merck      |
| Kanamycin                   | 5 mg/ml in H <sub>2</sub> O   | Carl Roth GmbH + Co. KG    |
| Meropenem                   | 10 mg/ml in H <sub>2</sub> O  | Sigma Aldrich / Merck      |
| Rifampicin                  | 20 mg/ml in DMSO              | SERVA Electrophoresis GmbH |
| Tetracycline                | 15 mg/ml in H <sub>2</sub> O  | SERVA Electrophoresis GmbH |
| Trimethoprim                | 5 mg/ml in DMSO               | Sigma Aldrich / Merck      |
| Tigecycline                 | 100 mg/ml in H <sub>2</sub> O | LKT Laboratories, Inc.     |
| Vancomycin                  | 100 mg/ml in H <sub>2</sub> O | SERVA Electrophoresis GmbH |

### 1.4 Generation of *Gaussia* luciferase reporter strains

All reporter strains were generated by  $\lambda$ -Red recombination as described (5). The strains C600W34 and *C. rodentium* DBS770 were transformed with pKD46 (5). The template plasmid pWRG701 was used to amplify reporter gene *Gaussia princeps luc* with M43L/M110L mutations (here: *Gluc*) and a kanamycin-cassette flanked by Flp/FRT sites (FRT *aphT* FRT). To create C600W34  $\phi$ *stx2a::Gluc*, a PCR product was amplified using primers Stx2-Gluc fusion Fw and Stx2\_Com fusion Rev containing the reporter gene and the resistance cassette flanked by regions homologous to ~50-60 bp adjacent to the insertion site immediately upstream of *stx2aA* and *stx2aB*. All primer sequences are listed in supplementary **Table S2**. Correct insertion of the reporter was verified by PCR using the primers Stx2A outside Fw and Stx2B primer Rev and sequencing (additional oligonucleotide: Seq Com Rev). To construct the *C. rodentium* DBS770 reporter strain mutant, Gibson assembly

26 was used to create a template plasmid containing the reporter gene followed  
27 by the kanamycin resistance cassette and flanked by 400 bp regions homo-  
28 logous to the target region in DBS770. The oligonucleotides GA DBS Stx2 up  
29 Fw and GA DBS Stx2 up Rev were used to amplify the 400 bp region upstream  
30 of *stx2A* and the primers GANewDBS Stx2B dn Fw and GA DBS Stx2B dn Rev  
31 were used to amplify the region downstream of *stx2dA*. For both PCR reactions  
32 genomic DNA of DBS770 was used as a template. The *Gluc* gene and the  
33 Kanamycin cassette were amplified by PCR with the primers GA DBS GlucKan  
34 Fw and GANewDBS Stx2 Rev with a linearized pWRG701 as the template. The  
35 pSB377 backbone was cut via *Bam*HI and *Not*I. Gibson assembly was per-  
36 formed with the three purified PCR products and the cut vector using the Gibson  
37 assembly master mix (NEB) following the manufacturer's instructions. The re-  
38 sulting plasmid (pMBK4) was linearized and used for  $\lambda$ -Red recombination.  
39 Correct insertion of the reporter was verified by PCR using the primers Stx2A  
40 outside Fw and DBS770 outside Rev and sequenced (additional primer: Seq  
41 Com Rev).

42

### 43 **1.5 Serology**

44 Upon necropsy, blood was taken by cardiac puncture and serum was prepared  
45 by centrifugation and separation in Microvette<sup>®</sup> 500 Z-Gel tubes (Sarstedt) and  
46 frozen for serology. Blood urea nitrogen (BUN) was measured using a Fuji DRI-  
47 CHEM NX500 automatic dry-chemistry analyzer (Fujifilm Corporation).

48

### 49 **1.6 Histology and pathological evaluation**

50 Colon and kidneys were removed and fixed in Roti-Histofix (Roth) for 24 hours

51 and stored in 70% ethanol until further use. Samples were embedded in paraffin  
52 and 3 µm thick sections were stained with hematoxylin-eosin according to  
53 standard laboratory procedures. Sections were analyzed randomized and  
54 blinded to the experimental groups. Tubulus necrosis was graded as follows: 1  
55 = sporadic tubulus necrosis or dilation, 2 = 30-50% of the tubuli show necrosis,  
56 3 = more than 50% of the tubuli show necrosis. The colon was scored by 5  
57 markers as follows: inflammation: 1 = few inflammatory cells in lamina propria,  
58 2 = clearly visible inflammatory cells reaching submucosa, 3 = transmural  
59 invasion of inflammatory cells. Epithelial erosion: 1 = sporadic erosion of  
60 epithelial cells, 2 = clearly visible erosion of epithelial cells, with moderate  
61 amounts of sloughed cells in lumen, 3 = thinning of crypt walls and large  
62 amounts of sloughed cells in lumen. Goblet cell loss: 1 = slightly reduced  
63 number of goblet cells, 2 = moderate loss of goblet cells with sporadic increase  
64 in size, 3 = severe loss of goblet cells with marked increase in size of goblet  
65 cells. Epithelial hyperplasia: 1 = up to 100% increase in thickness, 2 = more  
66 than 100% increase in thickness, 3= more than 100% increase in thickness and  
67 altered morphology. Area involved: 1= up to 30%, 2= 40-70%, 3= more than  
68 70%.

69

## 70 **1.7 References:**

- 71 1. Perna NT, Plunkett G , Burland V, Mau B, Glasner JD, Rose DJ, Mayhew  
72 GF, Evans PS, Gregor J, Kirkpatrick HA, Pósfai G, Hackett J, Klink  
73 S, Boutin A, Shao Y, Miller L, Grotbeck EJ, Davis NW, Lim A, Dimalanta  
74 ET, Potamosis KD, Apodaca J, Anantharaman TS, Lin J, Yen  
75 G, Schwartz DC, Welch RA, Blattner FR. Genome sequence of

- 76 enterohaemorrhagic *Escherichia coli* O157:H7. *Nature*. 2001; 409: 529-  
77 533.
- 78 2. Tietze E, Dabrowski PW, Prager R, et al. Comparative genomic analysis of  
79 two novel sporadic Shiga toxin-producing *Escherichia coli* O104:H4 strains  
80 isolated 2011 in Germany. *PLoS ONE*. 2015; 10(4): e0122074.
- 81 3. Mallick EM, McBee ME, Vanguri VK, et al. A novel murine infection model  
82 for Shiga toxin-producing *Escherichia coli*. *J Clin Invest*. 2012;  
83 122(11):4012–24.
- 84 4. O'Brien, Alison D., et al. "Shiga-like toxin-converting phages from *Esche-*  
85 *richia coli* strains that cause hemorrhagic colitis or infantile diarrhea."  
86 *Science*. 1984; 226.4675: 694-696.
- 87 5. Datsenko KA, Wanner B. One-step inactivation of chromosomal genes in  
88 *Escherichia coli* K-12 using PCR products. *Proc. Natl. Acad. Sci. USA*  
89 2000; 97:6640-6645.
- 90 6. Miroid, S., W. Rabsch, M. Rohde, S. Stender, H. Tschape, H. Russmann,  
91 E. Igwe, and W. D. Hardt. Isolation of a temperate bacteriophage encoding  
92 the type III effector protein SopE from an epidemic *Salmonella typhimurium*  
93 strain. *Proc. Natl. Acad. Sci. USA* 1999; 96:9840-9850.
- 94

95

## 2. Supplementary Figures

96

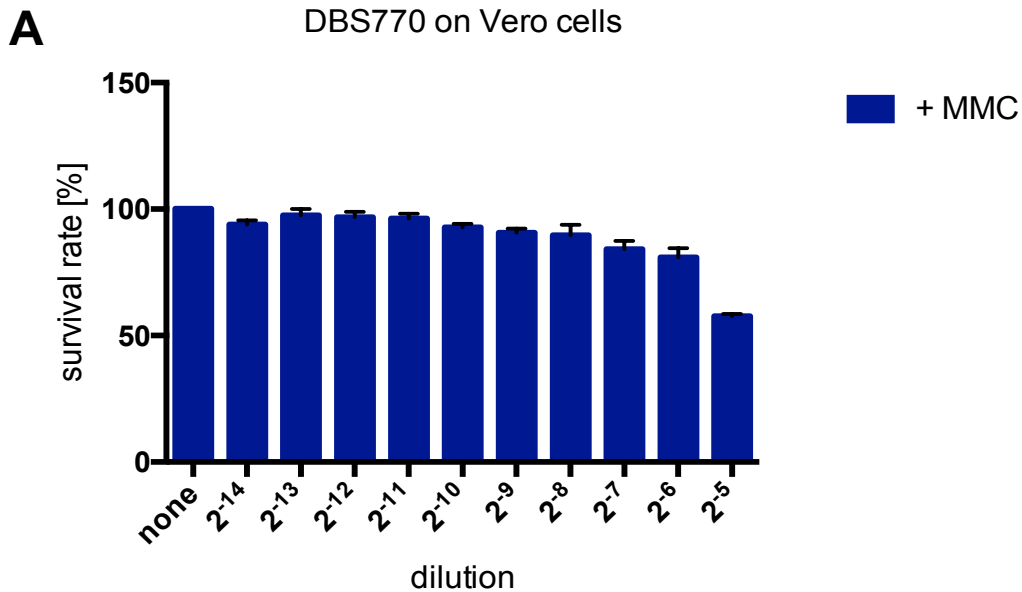

100

101

102

103

104

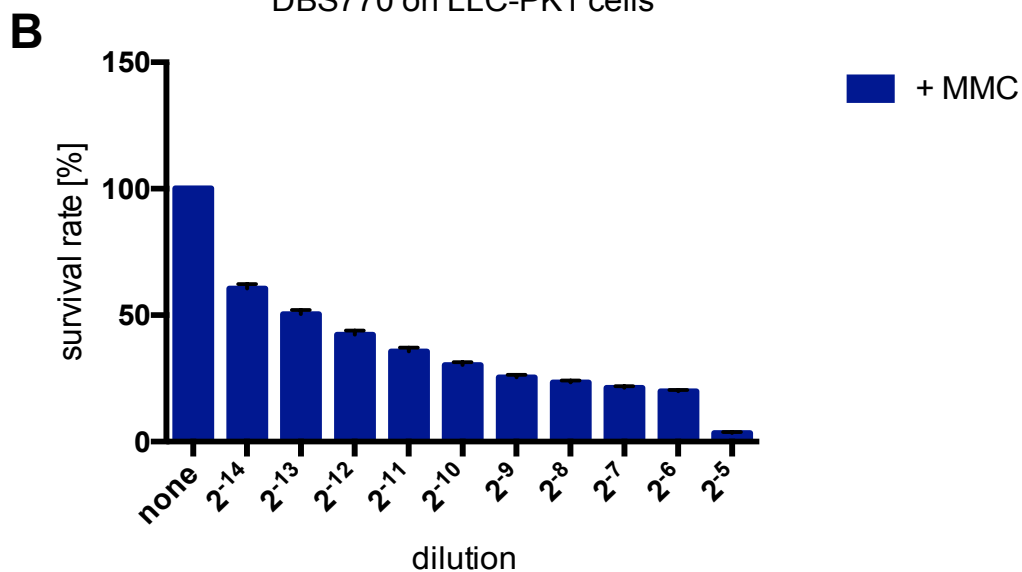

105

106

107

108

109

110

111

112

113

114

115

116

117

**Supplementary Figure 1.** Differences in cytotoxic activity of *C. rodentium*  $\phi$ stX<sub>2dact</sub> supernatants on VeroB4 and LLC-PK1 cells.

Dilutions of bacteria-free *C. rodentium*  $\phi$ stX<sub>2dact</sub> supernatants were added to VeroB4 cells (A) or LLC-PK1 cells (B). After incubation for 72 hours, XTT solution was added to PBS-washed cells for 2 hours. 0.01% Triton-X100 treated cells were used as positive (dead) control, while untreated cells were used as negative (live) control. After incubation, the absorbance of the samples was determined at 475 nm and the cell viability of untreated cells set to 100%. Shown are the mean values ( $\pm$ SEM) of three independent experiments performed in quadruplicates compared to untreated control. Statistical analysis was performed via unpaired Mann-Whitney tests (\* P < 0.05, \*\* P < 0.01, \*\*\* P < 0.001).

128

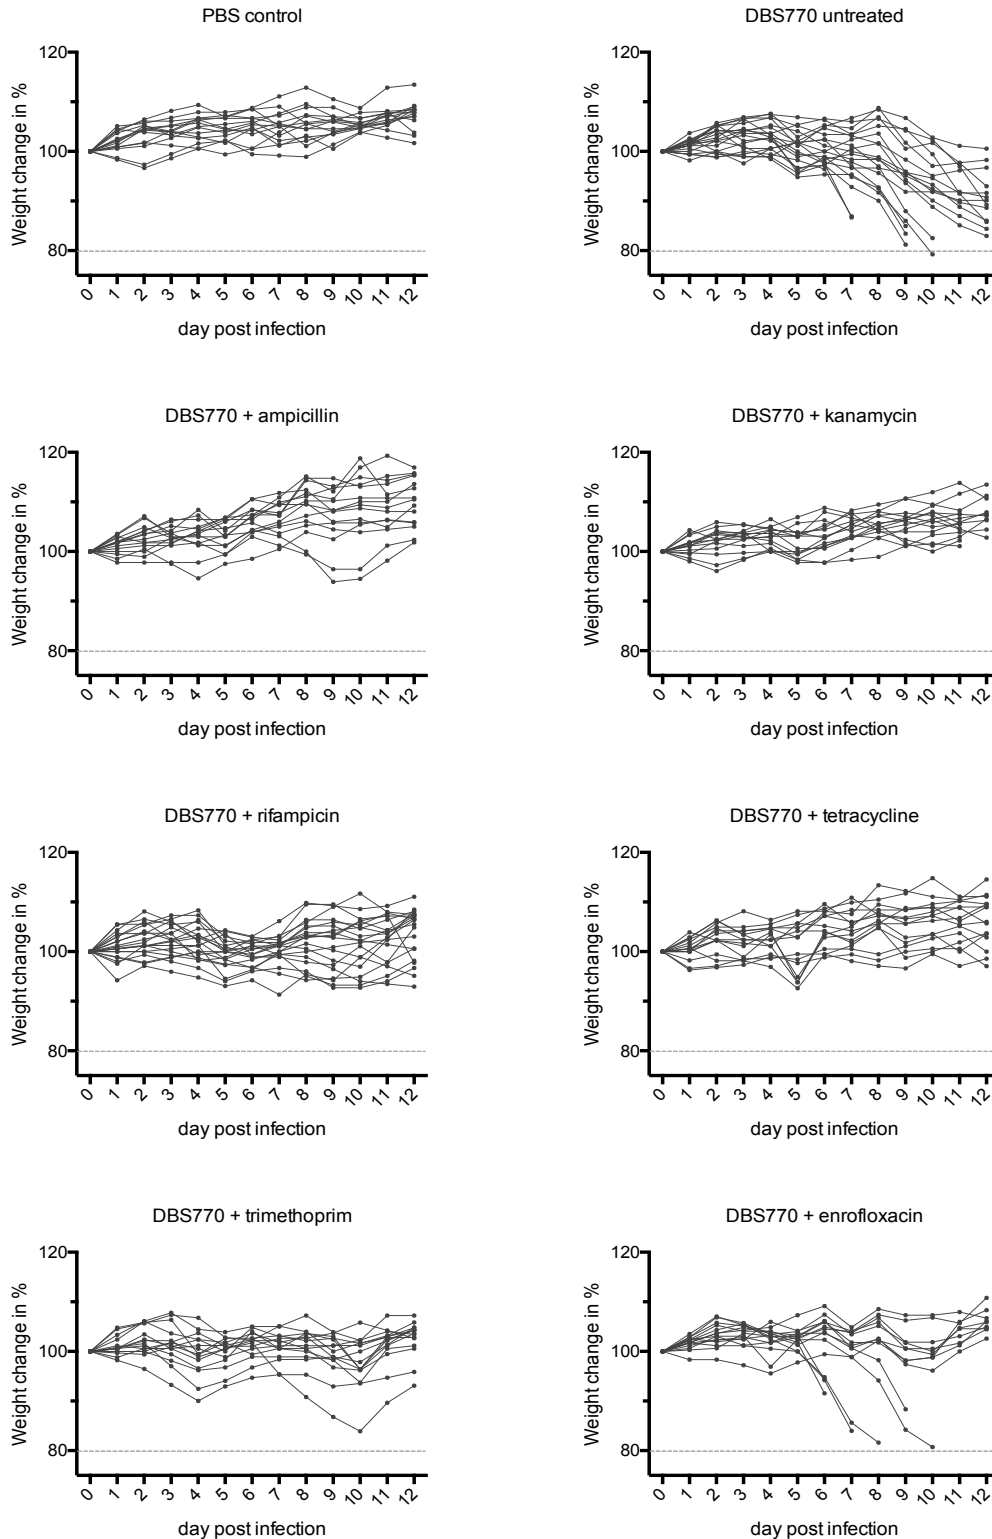

129  
 130  
 131  
 132  
 133  
 134  
 135  
 136

**Supplementary Figure 2.** Influence of antibiotic treatment of *C. rodentium*  $\phi$ stx<sub>2</sub>dact<sup>-</sup> infected mice on the weight of individual mice. Weight of each mouse is given for every study group (uninfected, untreated and antibiotics-treated mice). The weight of each mice at day 0 was set to 100%. The dashed line at 80% indicates the official termination point.



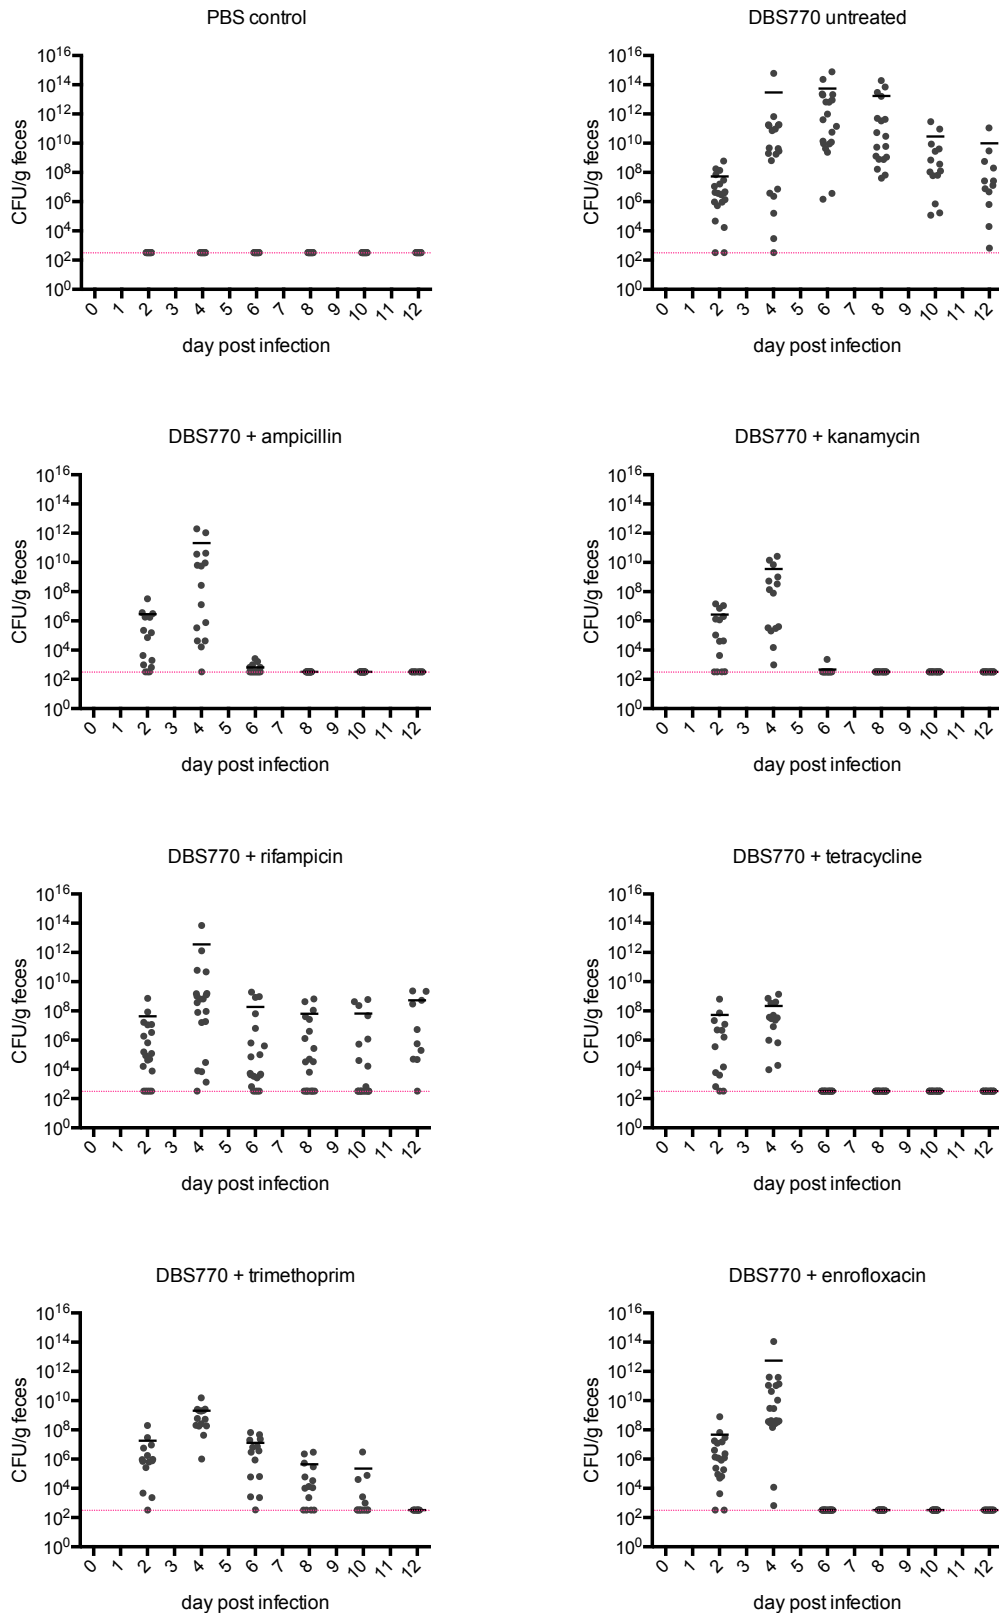

137  
138  
139  
140  
141  
142  
143

**Supplementary Figure 3.** Influence of antibiotic treatment of *C. rodentium*  $\phi$ stx<sub>2dact</sub>-infected mice on the bacterial colonization in individual mice.

The colonization with *C. rodentium*  $\phi$ stx<sub>2dact</sub> of each mouse on alternate days is given for every study group (uninfected, untreated and antibiotics-treated mice). Colonization was determined by feces count. Each dot represents one mouse, the means are indicated. The dotted line denotes the detection limit of the analysis.
